# Supplementary material
Source: PubMed Central journal article supplement (PMC6929040)
Supplement: sb9b00310_si_001.pdf [file sb9b00310_si_001.pdf]

## Identification of three antimicrobials activating serotonin receptor 4 in colon cells

Emily A. Yasi<sup>1</sup>, Aurelia A. Allen<sup>1</sup>, Widiarti Sugianto<sup>1</sup>, Pamela Peralta-Yahya<sup>1,2\*</sup>

### Supporting Information

|                                                                                                      | Page |
|------------------------------------------------------------------------------------------------------|------|
| <b>Materials and Methods</b>                                                                         | 1    |
| <b>Table S1.</b> Table of plasmids                                                                   | 2    |
| <b>Table S2.</b> Table of primers                                                                    | 2    |
| <b>Table S3.</b> Table of strains                                                                    | 2    |
| <b>Table S4.</b> Table of chemical descriptors used in PCA analysis                                  | 2    |
| <b>Table S5.</b> Chemical space composition of the natural product library                           | 3    |
| <b>Figure S1.</b> Three-day 96 well-plate validation assay                                           | 3    |
| <b>Figure S2.</b> Dose response curves of the 6 natural product hits that could not be validated     | 4    |
| <b>Figure S3.</b> Dose response curves of the 4 anti-infection hits that could not be validated.     | 4    |
| <b>Fig. S4.</b> Photomicrographs of colon cell migration assay after 0, 24, and 48 hours             | 5    |
| <b>Fig. S5.</b> Photomicrographs of colon cell scratch wound healing assay after 0, 24, and 48 hours | 6    |
| <b>Sequences</b>                                                                                     | 6    |

**Materials.** Serotonin hydrochloride (S0370) was purchased from TCI Chemicals. RS67333 hydrochloride (SML1882), tegaserod malate (SML1504), metoclopramide monohydrochloride (M0763), prucalopride (SML1371), cisapride (CDS021610), mosapride citrate (M2946) and zacopride hydrochloride hydrate (SML0081) were purchased from Sigma-Aldrich. Nano-Glo® Luciferase Assay System (N1120) was purchased from Promega. The natural products library (L1400) and the anti-infection library (L3100) were purchased from Selleck Chemicals. Breathe Easy Sealing Membrane was purchased from Electron microscope services. Luminescence white 96-well plates were purchased from Thermo.

**Toxicity assessment.** An overnight culture of PPY1808 in SD(HL<sup>-</sup>) was used adjusted to an OD of 1. In a 96 well plate, 190  $\mu$ L of pH=7 SD(HL<sup>-</sup>), 8  $\mu$ L of PPY1808, and 2  $\mu$ L of DMSO, ethracridine in DMSO, proflavine in water, or rezaprazan in DMSO (final concentrations 0, 10 $\mu$ M, 100  $\mu$ M) were added. The plate was incubated in a Tecan Infinite M200 Pro plate reader at 30 °C with shaking and OD<sub>600</sub> was measured at 2.5 hours.

**Table S1.** Table of Plasmids

| Plasmid Number | Plasmid Name | Description               | Citation               |
|----------------|--------------|---------------------------|------------------------|
| PPY111         | pKM111       | pESC-His3-pTEF1-tCYC1     | Mukherjee et al. 2015  |
| PPY1192        | pTMC18       | pESC-His3-pTEF1-HTR4      | Ehrenworth et al. 2017 |
| PPY1740        | pEY15        | pRS415-Leu2-pFIG1-NanoLuc | This study             |

**Table S2.** Table of Primers

| Primer Name | Sequence                  |
|-------------|---------------------------|
| EY248       | gctgttgaaataacaaagacattgg |

**Table S3.** Table of Strains

| Strain Number | Description                                                                                                                    | Citation              |
|---------------|--------------------------------------------------------------------------------------------------------------------------------|-----------------------|
| PPY140        | <i>S. cerevisiae</i> W303 MATa ade2-1 ura3-1 his3-11 trp1-1 leu2-3 leu2-112 can1-100 $\Delta far1$ $\Delta ste2$ $\Delta sst2$ | Mukherjee et al. 2015 |
| PPY1808       | PPY140 carrying pTMC18 and pEY15                                                                                               | This study            |
| PPY1809       | PPY140 carrying pKM111 and pEY15                                                                                               | This study            |

**Table S4.** Table of chemical descriptors used in PCA analysis

| Descriptors                    | Abbreviations | Descriptors                | Abbreviations |
|--------------------------------|---------------|----------------------------|---------------|
| Molecular Weight               | MW            | Ring system count          | RSC           |
| Carbon atom count              | CAC           | Size of largest ring       | SLR           |
| Hydrogen atom count            | HAC           | Van der Waals surface area | VSA           |
| Oxygen atom count              | OAC           | Amine                      | -             |
| Nitrogen atom count            | NAC           | Alcohol                    | -             |
| Hydrogen-bond donors           | HBD           | Ether                      | -             |
| Hydrogen-bond acceptor         | HBA           | Aldehyde                   | -             |
| Rotatable bonds                | RB            | Ketone                     | -             |
| Stereocenter count             | SC            | Carboxylic Acid            | -             |
| Topological polar surface area | TPSA          | Ester                      | -             |
| Number of rings                | NOR           | Amide                      | -             |
| Aromatic ring count            | ARC           |                            |               |

**Table S5.** Chemical space composition of the natural product library.

| Chemical Space | PC1 | PC2 | PC3           | Members | Population (%) | Chemical characteristics                                                                                                                                                         |
|----------------|-----|-----|---------------|---------|----------------|----------------------------------------------------------------------------------------------------------------------------------------------------------------------------------|
| 1              | -   | -   | -             | 128     | 16             | Mix of aromatics and groups containing N and O atoms                                                                                                                             |
| 2              | +   | -   | -             | 88      | 11             | Steric, heterocyclic with O-containing functional groups                                                                                                                         |
| 3              | -   | -   | +             | 177     | 22             | small heteroaromatics (fused rings) with O-containing functional groups                                                                                                          |
| 4              | +   | -   | +             | 90      | 11             | Adjacent to CS 3, hence similar trend, except higher C-atom count                                                                                                                |
| 5              | +   | +   | -             | 47      | 6              | chiral with multiple functional groups (phosphate, sulfate, N and O-containing functional groups)                                                                                |
| 6              | -   | +   | -             | 124     | 16             | Two distinct groups: A) long C-tail containing only N or O-functional group. B) complex heterocyclic (individual benzene rings) having both N and O-containing functional groups |
| 7              | +   | +   | +             | 49      | 6              | hydrocarbons and cyclic rings                                                                                                                                                    |
| 8              | -   | +   | +             | 98      | 12             | Adjacent to CS 6, hence similar trend, except heteroaromatics are fused rings                                                                                                    |
|                |     |     | <b>Total:</b> | 801     | 100            |                                                                                                                                                                                  |

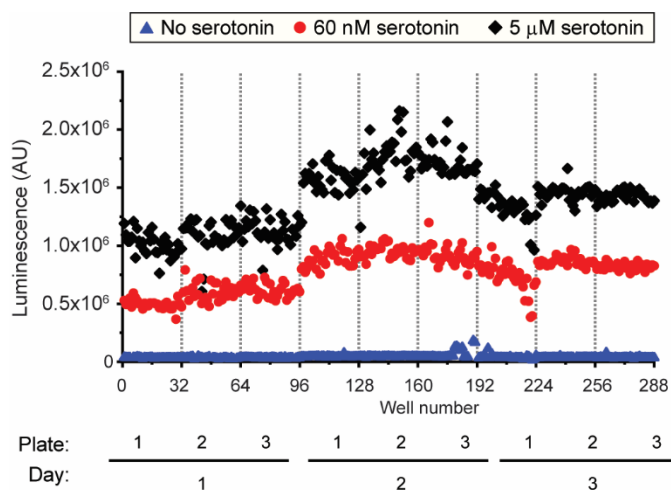

**Fig. S1.** Three-day 96 well-plate validation assay. Luminescence data with no, medium and high levels of serotonin. No obvious intra-plate edge effects or drift observed. The signal activation levels did fluctuate from day to day, but all raw midpoint CVs were below 20%.

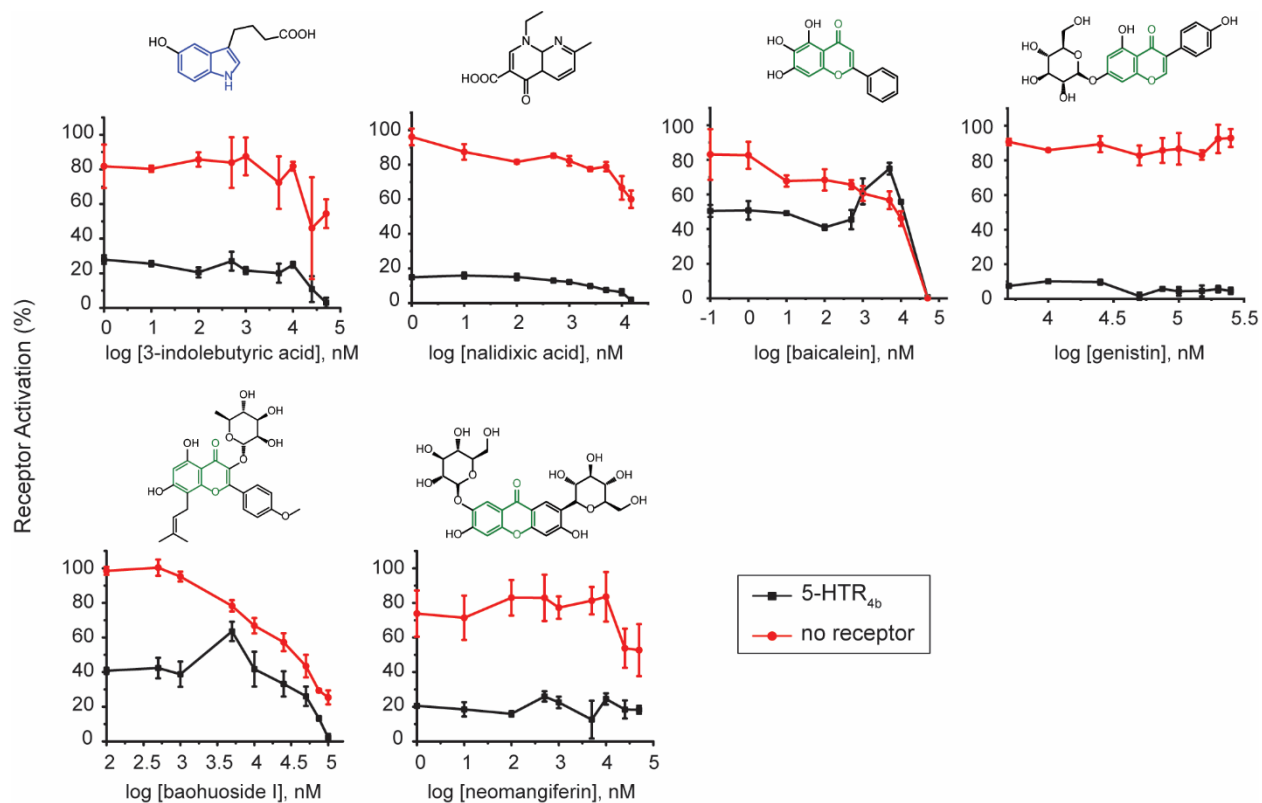

**Fig. S2.** Dose response curves of the 6 natural product hits that could not be validated

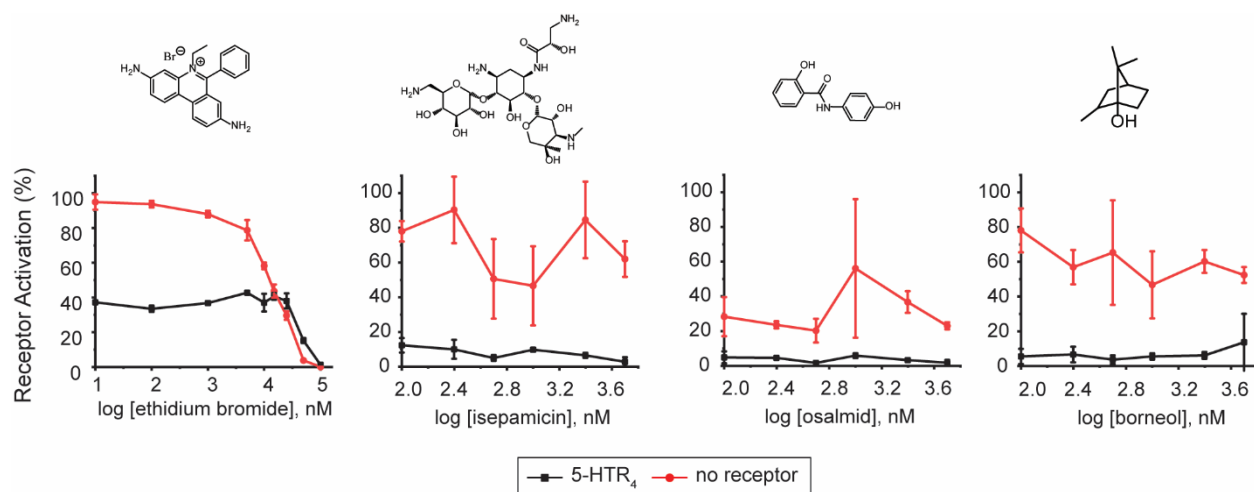

**Fig. S3.** Dose response curves of the four anti-infection hits that could not be validated

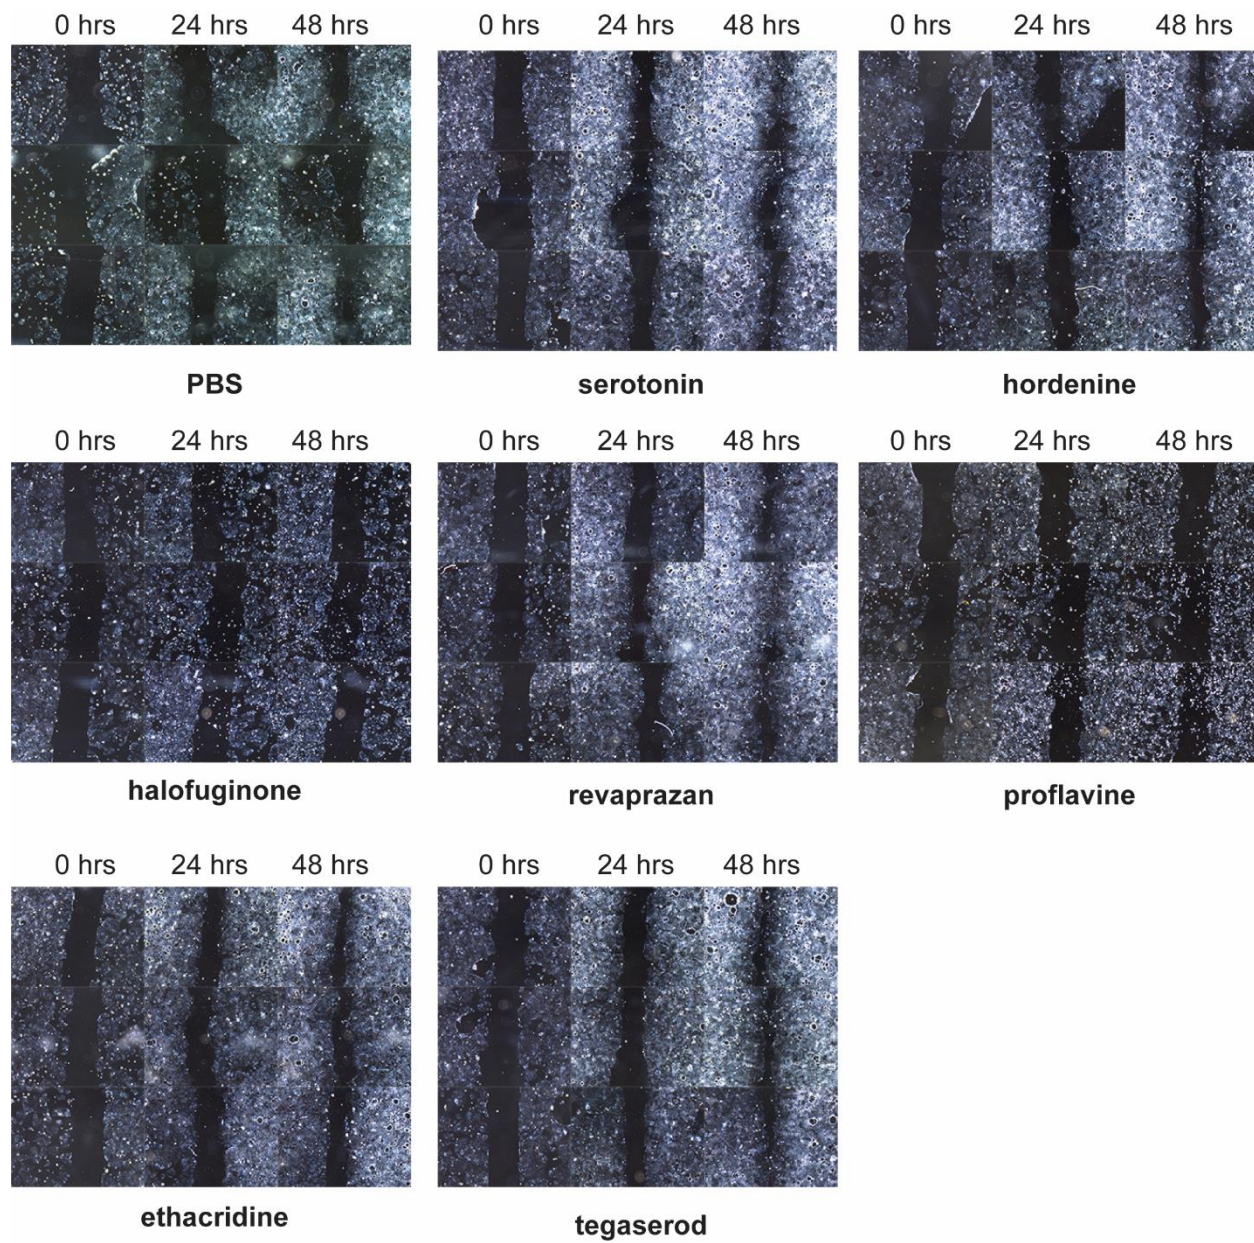

**Fig. S4.** Photomicrographs of colon cell migration assay after 0, 24, and 48 hours.



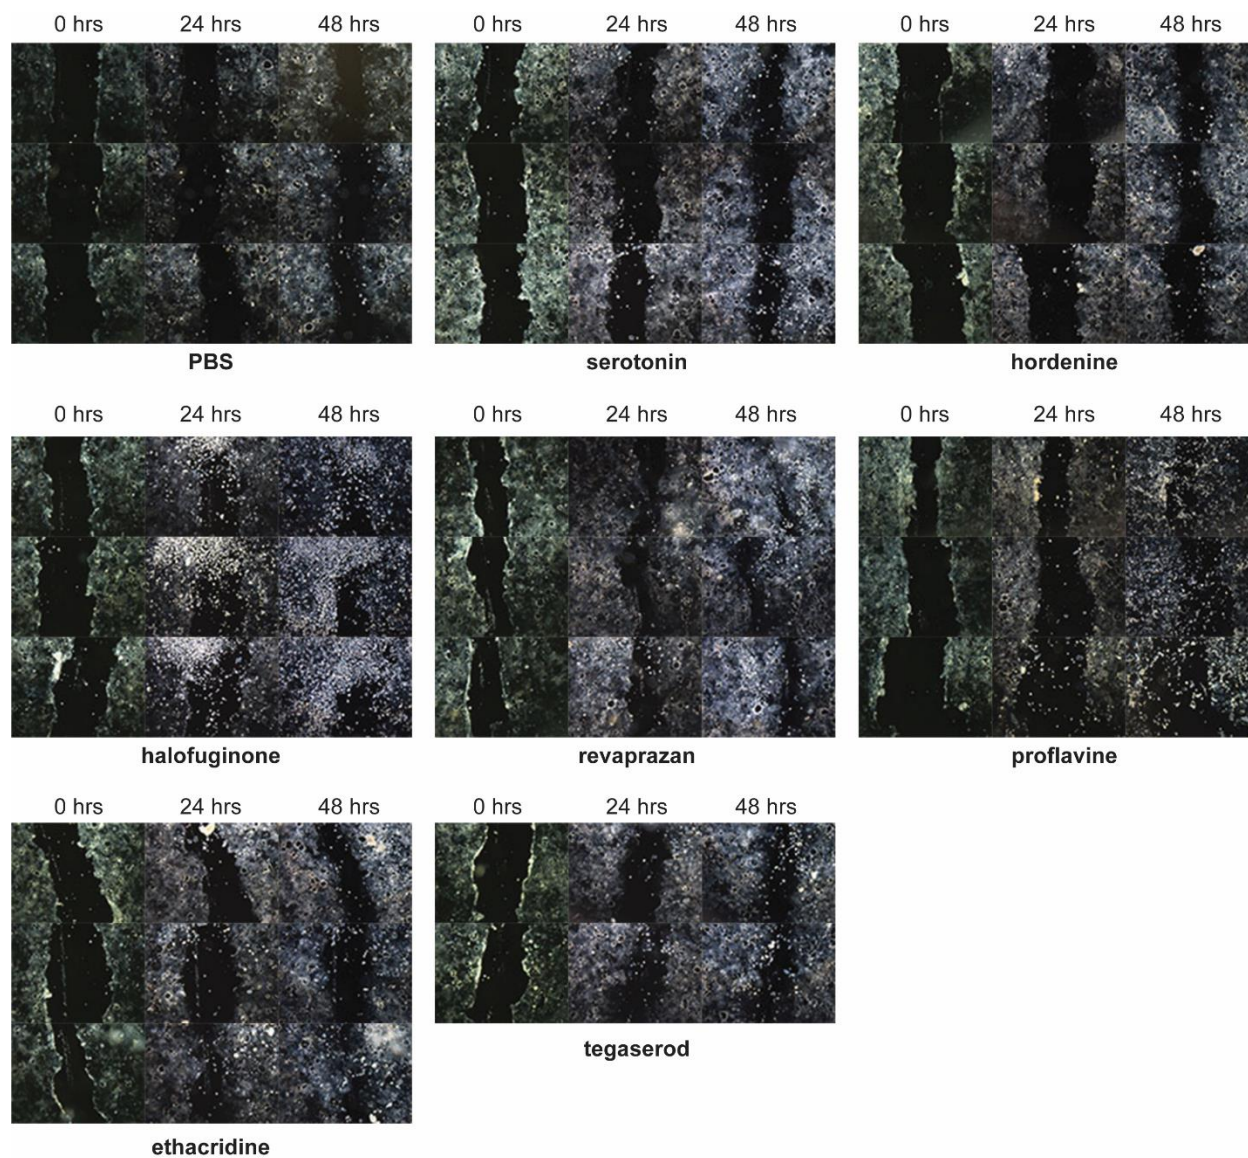

**Fig. S5.** Photomicrographs of colon cell scratch wound healing assay after 0, 24, and 48 hours.

### Sequences

Yeast optimized Nanoluc sequence

```

ATGGTCTTCACCTTGGAAGATTTTCGTCGGTGATTGGAGACAAACCGCTGGTTACAACCTTGG
ATCAAGTCTTAGAGCAGGGTGGAGTCTCCTCCTTGTTTCAAACCTTGGGAGTCTCCGTCAC
CCCAATTCAAAGAATTGTTTTGTCCGGTGAAAATGGTTTGAAAATTGATATTCATGTCATTAT
TCCTTACGAAGGTTTGTCCGGTGATCAAATGGGTCAAATTGAAAAGATTTTCAAGGTCGTCCT
ACCCAGTTGATGATCATCATTTTTAAAGTCATTTTGCATTACGGTACCTTGGTCATTGATGGT
GTCACCCCAAACATGATTGATTACTTTGGTAGACCTTACGAAGGTATTGCTGTCTTTGATGG
TAAGAAGATTACCGTTACTGGTACCTTGTGGAATGGTAACAAGATTATTGATGAAAGATTGA
TTAACCAGATGGTTCCTTGTTGTTTAGAGTCACTATTAATGGTGTCACTGGTTGGAGATTG
TGTGAAAGAATTTTGGCTTAA

```
